# Supplementary material for: T cells sense biophysical cues using lamellipodia and filopodia to optimize intraluminal path finding
Source: Royal Society of Chemistry journal article supplement (doi:10.1039/c4ib00021h), 2014-01-01
Supplement: c4ib00021h1.pdf [file c4ib00021h1.pdf]

## Supplementary Information (SI)

### Supplemental figures

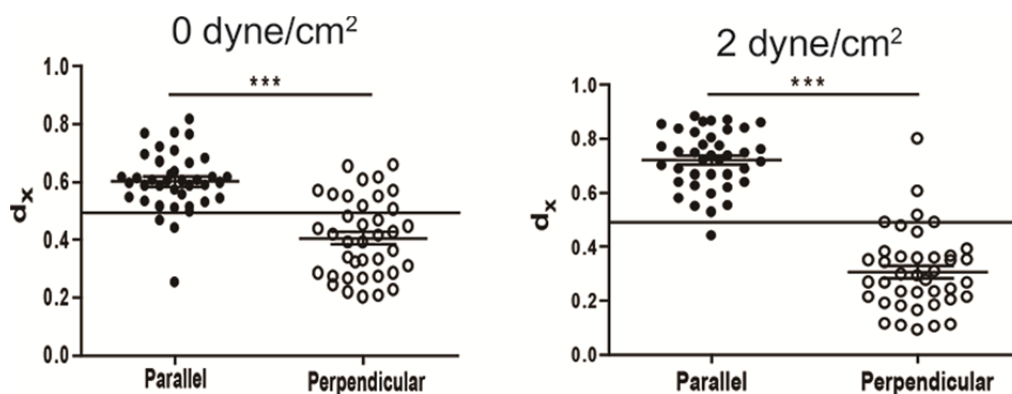

**Figure S1.** d<sub>x</sub> values of T cells in the absence of SDF-1 $\alpha$ . (Mann-Whitney U-test, two-tailed, \*\*\*p < 0.001)

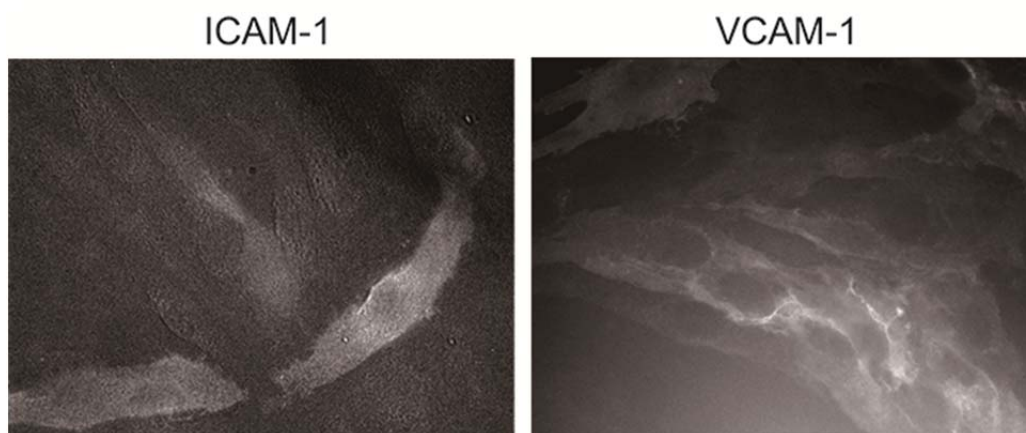

**Figure S2** Distribution of adhesion molecules (ICAM-1, VCAM-1) on the surfaces of ECs. TNF- $\alpha$ -treated EC layers were fixed and stained with anti-ICAM-1-FITC or anti-VCAM-1-FITC and fluorescence images were acquired.

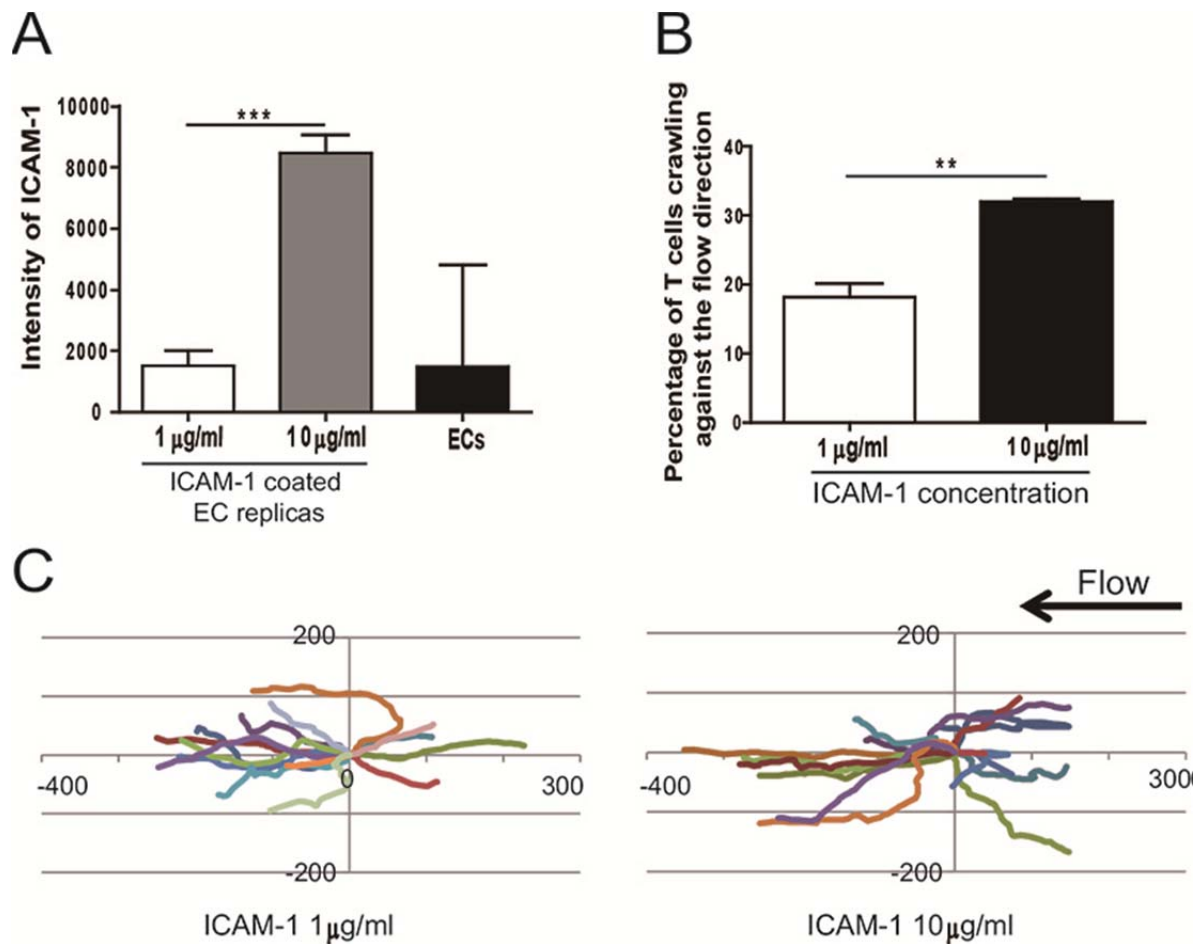

**Figure S3** Effect of ICAM-1 concentration on T cell crawling. (A) Relative ICAM-1 surface density of ICAM-1-coated EC replicas and TNF- $\alpha$ -stimulated ECs measured by fluorescence intensity of anti-ICAM-1-FITC. EC replicas coated with ICAM-1 (1  $\mu\text{g/ml}$  or 10  $\mu\text{g/ml}$ ) and fixed EC layers were stained with anti-ICAM-1-FITC, and imaged with fluorescence microscope with identical settings; fluorescence intensities were measured and plotted after background subtraction. (B, C) Effect of ICAM-1 concentration on crawling direction of T cells with respect to the flow direction. EC replicas of well-aligned ECs were coated with ICAM-1 (1  $\mu\text{g/ml}$  or 10  $\mu\text{g/ml}$ ) and flow assays were performed with the parallel configuration. Percentages of T cells crawling against the flow direction were measured and plotted (B) and representative trajectories of T cells were drawn (C). Data are pulled from 5 independent experiments (Mann-Whitney U-test, two-tailed,  $**p < 0.01$ ).

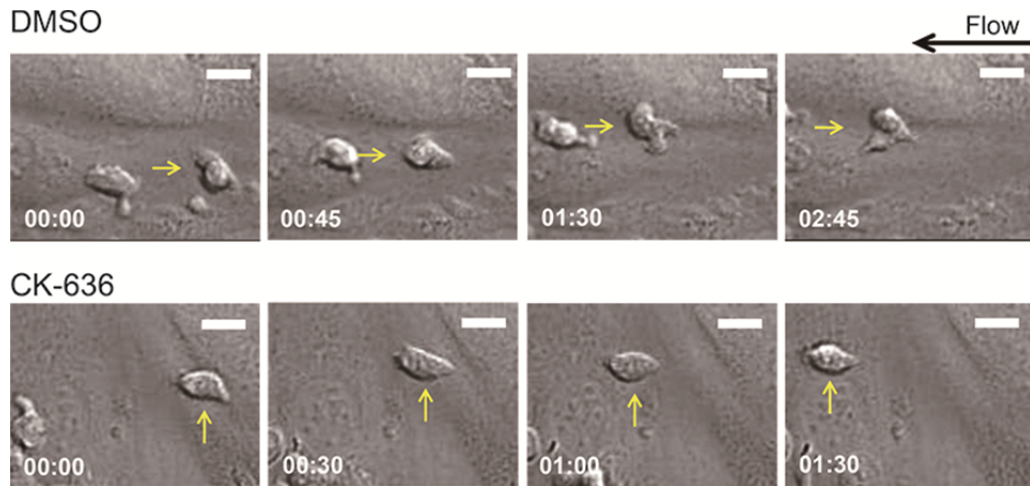

**Figure S4** Time-lapse images of T cells treated with either DMSO or CK-636. Scale bar: 10  $\mu\text{m}$ . Elapsed time: mm:ss.

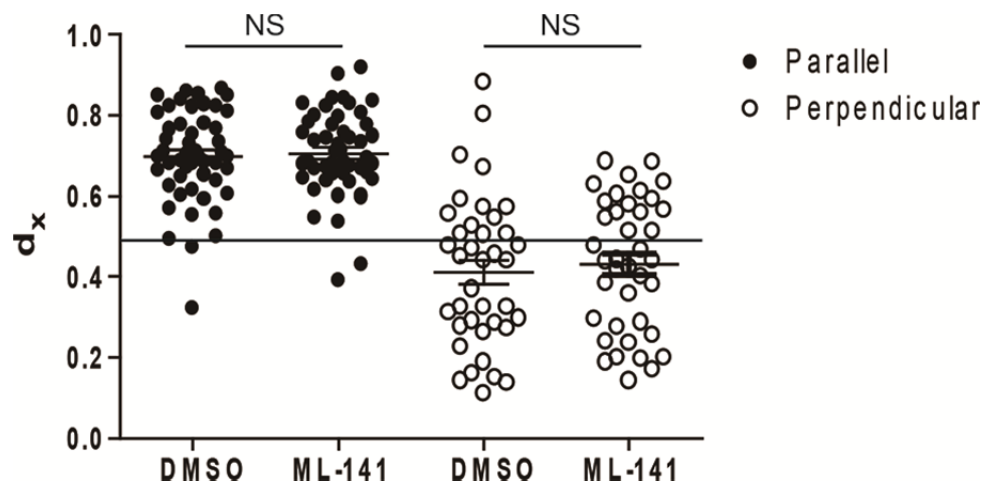

**Figure S5** Effect of ML-141 treatment on  $d_x$  values of crawling T cells on ECs (Mann-Whitney U-test, two-tailed).

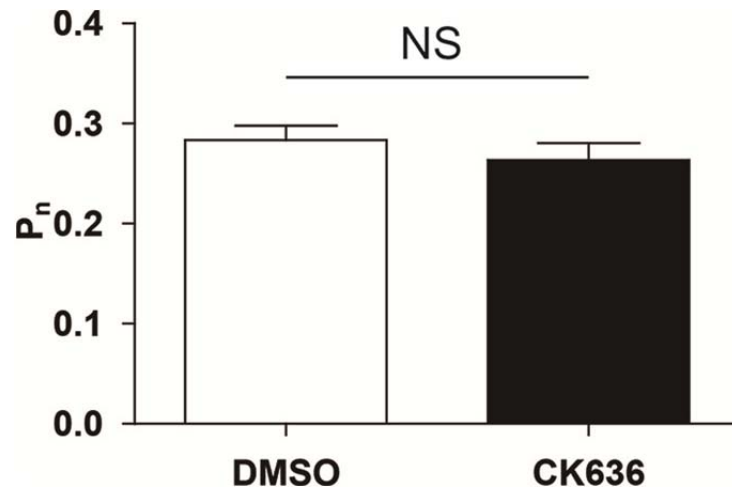

**Figure S6** Effect of CK636 treatment on  $P_n$  values of crawling T cells on ECs. Data are pooled from 5 independent experiments (DMSO:  $n = 116$ , ML-141:  $n = 110$ ).

## **Supplemental movie legends**

**Movie S1.** A representative T cell crawling along junctions of endothelial cells (ECs). Red: T cell, green: VE-cadherin, and blue: nuclei of ECs.

**Movie S2.** A representative T cell avoiding nucleus of an EC. Blue: nuclei of ECs.

**Movie S3.** A representative DMSO-treated T cell crawling on ECs.

**Movie S4.** A representative CK636-treated T cell crawling on ECs.
